# Supplementary material for: Drug-Disease Severity and Target-Disease Severity Interaction Networks in COVID-19 Patients
Source: MDPI journal article supplement (doi:10.3390/pharmaceutics14091828), 2022-08-30
Supplement: s1 [file s1]

**Supplements:****Drug-disease severity and target-disease severity interaction networks in COVID-19 patients****Table S1: Assignment of ATC codes to the drug groups and subgroups**

| Group              | Subgroup                                            | Included ATC codes                                                                                                                                                               |
|--------------------|-----------------------------------------------------|----------------------------------------------------------------------------------------------------------------------------------------------------------------------------------|
| Analgesics         | Antimigraine preparations                           | N02C                                                                                                                                                                             |
|                    | Nonsteroidal anti-inflammatory drugs (NSAIDs)       | M01A, C01EB16, R02AX02                                                                                                                                                           |
|                    | Opioids                                             | N02A                                                                                                                                                                             |
|                    | Other analgesics and antipyretics                   | N02B                                                                                                                                                                             |
| Antacids           | Antacids                                            | A02A                                                                                                                                                                             |
| Antiepileptics     | Antiepileptics                                      | N03                                                                                                                                                                              |
| Antihemorrhagics   | Antifibrinolytics                                   | B02A                                                                                                                                                                             |
|                    | Vitamin K and other hemostatics                     | B02B                                                                                                                                                                             |
| Antihistamines     | Antihistamines                                      | R06A                                                                                                                                                                             |
| Antihyperglycemics | Alpha glucosidase inhibitors                        | A10BF, A10BD17                                                                                                                                                                   |
|                    | Biguanides                                          | A10BA, A10BD01, A10BD02, A10BD03, A10BD05, A10BD07, A10BD08, A10BD10, A10BD11, A10BD13, A10BD14, A10BD15, A10BD16, A10BD17, A10BD18, A10BD20, A10BD22, A10BD23, A10BD25, A10BD26 |
|                    | Dipeptidyl peptidase 4 (DPP-4) inhibitors           | A10BH, A10BD19, A10BD21, A10BD24, A10BD25, A10BD26, A10BD07, A10BD08, A10BD09, A10BD10, A10BD11, A10BD12, A10BD13, A10BD18, A10BD22                                              |
|                    | Glucagon like peptide 1 (GLP-1) analogues           | A10BJ                                                                                                                                                                            |
|                    | Other blood glucose lowering drugs, excl. insulins  | A10BX                                                                                                                                                                            |
|                    | Sodium glucose co-transporter 2 (SGLT 2) inhibitors | A10BK, A10BD14, A10BD15, A10BD16, A10BD19, A10BD20, A10BD21, A10BD23, A10BD24, A10BD25, A10BD19, A10BD20, A10BD21                                                                |

| Group                | Subgroup                            | Included ATC codes                                                                                                                                               |
|----------------------|-------------------------------------|------------------------------------------------------------------------------------------------------------------------------------------------------------------|
|                      | Sulfonylureas                       | A10BB, A10BD01, A10BD02, A10BD04, A10BD06, A10BD14                                                                                                               |
|                      | Thiazolidinediones                  | A10BG, A10BD09, A10BD12, A10BD03, A10BD04, A10BD05, A10BD06, A10BD26                                                                                             |
| Anti-infectives      | Antibiotics                         | J01                                                                                                                                                              |
|                      | Antifungals                         | D01B                                                                                                                                                             |
|                      | Antivirals                          | J05                                                                                                                                                              |
| Antiobesity          | Antiobesity                         | A08                                                                                                                                                              |
| Anti-Parkinson drugs | Anticholinergic agents              | N04A                                                                                                                                                             |
|                      | Dopaminergic agents                 | N04B                                                                                                                                                             |
|                      | Other anti-Parkinson drugs          | N04C                                                                                                                                                             |
| Anticoagulants       | Direct factor Xa inhibitors         | B01AF                                                                                                                                                            |
|                      | Vitamin K antagonists               | B01AA                                                                                                                                                            |
|                      | Heparin                             | B01AB                                                                                                                                                            |
|                      | Direct thrombin inhibitors          | B01AE                                                                                                                                                            |
|                      | Other antithrombotic agents         | B01AX                                                                                                                                                            |
| Antiplatelet         | Platelet aggregation inhibitors     | B01AC                                                                                                                                                            |
|                      | Acetylsalicylic acid                | B01AC06, N02BA01, M01BA03, N02BA51, B01AC56, C10BX08, C10BX12, C10BX06, C07FX04, N02AJ07, N02AJ02, C07FX03, N02AJ18, C10BX02, C10BX05, C10BX01, C10BX04, C07FX02 |
| Calcium homeostasis  | Parathyroid hormones and analogues  | H05A                                                                                                                                                             |
|                      | Anti-parathyroid agents             | H05B                                                                                                                                                             |
| Cardiovascular drugs | Antihypertensives                   | C02                                                                                                                                                              |
|                      | Beta blockers                       | C07, C09BX, C09DX                                                                                                                                                |
|                      | Calcium channel blockers            | C08, C09BB, C07FB, C09DB, C10BX03, C10BX09, C10BX14, C10BX18, C10BX07, C10BX11, C10BX09                                                                          |
|                      | Cardiac therapy                     | C01                                                                                                                                                              |
|                      |                                     |                                                                                                                                                                  |
| Cold drugs           | Expectorants                        | R05C                                                                                                                                                             |
|                      | Cough suppressants                  | R05D                                                                                                                                                             |
|                      | Expectorants and cough suppressants | R05F                                                                                                                                                             |

| Group                                                              | Subgroup                                                                         | Included ATC codes                                                                                                               |
|--------------------------------------------------------------------|----------------------------------------------------------------------------------|----------------------------------------------------------------------------------------------------------------------------------|
|                                                                    | Cold other                                                                       | R05X                                                                                                                             |
| Corticosteroids                                                    | Corticosteroids, inhalative                                                      | R03AK07, R03AK08,<br>R03AK09, R03AK10,<br>R03AK11, R03AK12,<br>R03AK13, R03AK14,<br>R03AL08, R03AL09,<br>R03AL11, R03AL12, R03BA |
|                                                                    | Corticosteroids systemic                                                         | H02B, H02AB, M01BA,<br>A07EA, A01AC                                                                                              |
| Diuretics                                                          | (in the ATC not further specified diuretics, therefore not part of any subgroup) | C07C, C08G, C09BA, C09DA, C02L                                                                                                   |
|                                                                    | Loop diuretics (high ceiling diuretics)                                          | C03C, C03EB                                                                                                                      |
|                                                                    | Low-ceiling diuretics                                                            | C03B                                                                                                                             |
|                                                                    | Potassium-sparing diuretics                                                      | C03DA, C03DB, C03E                                                                                                               |
|                                                                    | Thiazids                                                                         | C03A, C07B, C07D, C03EA01,<br>C03EA02, C03EA04,<br>C03EA06, C03EA07,<br>C03EA13, C10BX13,<br>C10BX14                             |
| Immunglobolins                                                     | Immunglobolins                                                                   | J06B                                                                                                                             |
| Immunosuppressants                                                 | Immunosuppressants                                                               | L04                                                                                                                              |
| Muscle relaxants                                                   | Muscle relaxants, peripherally acting agents                                     | M03A                                                                                                                             |
|                                                                    | Muscle relaxants, centrally acting agents                                        | M03B                                                                                                                             |
|                                                                    | Muscle relaxants, directly acting agents                                         | M03C                                                                                                                             |
| Obstructive airway diseases                                        | Adrenergic, inhalants                                                            | R03A                                                                                                                             |
|                                                                    | Other drugs for obstructive airway diseases, inhalants                           | R03B                                                                                                                             |
|                                                                    | Adrenergic for systemic use                                                      | R03C                                                                                                                             |
|                                                                    | Other systemic drugs for obstructive airway diseases                             | R03D                                                                                                                             |
| Insulins                                                           | Insulins                                                                         | A10A                                                                                                                             |
| Pancreatic hormone                                                 | Pancreatic hormone                                                               | H04                                                                                                                              |
| Drugs for peptic ulcer and gastro-esophageal reflux disease (GORD) | H2-receptor antagonists                                                          | A02BA                                                                                                                            |
|                                                                    | Prostaglandins                                                                   | A02BB                                                                                                                            |
|                                                                    | Proton pump inhibitors (PPIs)                                                    | A02BC, B01AC56                                                                                                                   |
|                                                                    | Combinations for eradication of Helicobacter pylori                              | A02BD                                                                                                                            |
|                                                                    | Other drugs for peptic ulcer and gastro-oesophageal reflux disease (GORD)        | A02BX                                                                                                                            |

| Group                                             | Subgroup                                              | Included ATC codes                                                                          |
|---------------------------------------------------|-------------------------------------------------------|---------------------------------------------------------------------------------------------|
| Pituitary and hypothalamic hormones and analogues | Anterior pituitary lobe hormones and analogues        | H01A                                                                                        |
|                                                   | Posterior pituitary lobe hormones                     | H01B                                                                                        |
|                                                   | Hypothalamic hormones                                 | H01C                                                                                        |
| Psychoanaleptics                                  | Antidepressants                                       | N06A, N06CA                                                                                 |
|                                                   | Psychostimulants, agents used for ADHD and nootropics | N06B, N06CB                                                                                 |
|                                                   | Anti-dementia drugs                                   | N06D                                                                                        |
| Psycholeptics                                     | Antipsychotics                                        | N05A                                                                                        |
|                                                   | Anxiolytics                                           | N05B                                                                                        |
|                                                   | Sedatives                                             | N05C                                                                                        |
| RAAS systemagents                                 | ACE inhibitors                                        | C09A, C09B, C10BX04, C10BX06, C10BX07, C10BX17, C10BX18, C10BX12, C10BX13, C10BX15, C10BX14 |
|                                                   | Renin inhibitors                                      | C09X, C09DX                                                                                 |
|                                                   | Sartans (angiotensin II receptor blockers)            | C09C, C09D, C10BX16, C10BX10                                                                |
| Respiratory other                                 | Respiratory other                                     | R07                                                                                         |
| Statins                                           | Statins                                               | C10AA, C10BA, C10BX                                                                         |
| Supplements                                       | Melatonin                                             | N05CH01                                                                                     |
|                                                   | Vitamin A                                             | A11CA, A11CB                                                                                |
|                                                   | Vitamin B                                             | A11D, A11E, A11HA02, A11HA04                                                                |
|                                                   | Vitamin C                                             | A11G, A11EB                                                                                 |
|                                                   | Vitamin D                                             | A11CC, A12AX, A11CB                                                                         |
|                                                   | Zinc                                                  | A12CB, A16AX05, B05XA12, B05XA18                                                            |
| Thyroid therapy                                   | Thyroid preparations                                  | H03A                                                                                        |
|                                                   | Antithyroid preparations                              | H03B                                                                                        |
|                                                   | Iodine therapy                                        | H03C                                                                                        |

**Table S2: Important network metrics of DDSI and TDSI network**

*Main node (hub):* node with the highest weight, i.e. the largest share of patients taking this drug, weight in % is indicated in the brackets;

*Main edge:* edge with the highest weight, i.e. the largest share of patients taking this drug combination, weight in % is indicated in the brackets;

*Diameter:* maximum distance between any two nodes; or: the longest shortest path;

*Node betweenness centrality:* betweenness, indicating how often a node lies on the shortest path between two other nodes, nodes with the highest differences in betweenness between the severity cohorts are shown

|                                           | Non-severe                                                         | Severe                                                             |
|-------------------------------------------|--------------------------------------------------------------------|--------------------------------------------------------------------|
| <b>Main node (hub) (weight in % )</b>     |                                                                    |                                                                    |
| Anatomical/ pharmacological groups        | Blood and blood forming organs (85.6)                              | Blood and blood forming organs (94.8)                              |
| Drug group                                | Analgesics (59.7)                                                  | Analgesics (60.9)                                                  |
| Drug subgroup                             | Other analgesics and antipyretics (56.4)                           | Other analgesics and antipyretics (54.8)                           |
| Molecular target                          | Prostaglandin G/H synthase 1 (68.9)                                | Prostaglandin G/H synthase 1 (75.0)                                |
| <b>Main edge (weight in % )</b>           |                                                                    |                                                                    |
| Anatomical/ pharmacological groups        | Blood and blood forming organs – nervous system (63.1)             | Blood and blood forming organs – nervous system (62.6)             |
| Drug group                                | Analgesics – anticoagulants (33.1)                                 | Analgesics – anticoagulants (34.8)                                 |
| Drug subgroup                             | <i>Other analgesics and antipyretics – heparin (24.4)</i>          | <i>Other analgesics and antipyretics – antibiotics (28.7)</i>      |
| Molecular target                          | Prostaglandin G/H synthase 1 – Prostaglandin G/H synthase 2 (65.4) | Prostaglandin G/H synthase 1 – Prostaglandin G/H synthase 2 (67.3) |
| <b>Diameter</b>                           |                                                                    |                                                                    |
| Anatomical/ pharmacological groups        | 2.82                                                               | 5.22                                                               |
| Drug group                                | 1.55                                                               | 3.48                                                               |
| Drug subgroup                             | 1.04                                                               | 2.61                                                               |
| Molecular target                          | 1.3                                                                | 2.88                                                               |
| <b>Node betweenness centrality</b>        |                                                                    |                                                                    |
| <i>Anatomical/ pharmacological groups</i> |                                                                    |                                                                    |
| Antiparasitic products                    | 70                                                                 | 25.9                                                               |
| Dermatologicals                           | 0                                                                  | 20.1                                                               |
| Musculo-skeletal system                   | 0                                                                  | 15.5                                                               |
| Systemic hormonal preparations            | 0                                                                  | 11.2                                                               |

|                                                   | Non-severe | Severe |
|---------------------------------------------------|------------|--------|
| Antineoplastic and immunomodulating agents        | 1          | 9.8    |
| Genito urinary system and sex hormones            | 8          | 1.3    |
| Sensory organs                                    | 0.7        | 3.9    |
| Various                                           | 0          | 2.4    |
| <i>Drug group</i>                                 |            |        |
| Calcium homeostasis                               | 108.7      | 0      |
| Muscle relaxants                                  | 80.1       | 0      |
| Pituitary and hypothalamic hormones and analogues | 52.3       | 91.2   |
| Anti-infectives                                   | 29.3       | 0      |
| Thyroid therapy                                   | 0          | 26.6   |
| Anti-Parkinson drugs                              | 3          | 28.7   |
| Antihistamines                                    | 42.7       | 19     |
| Diuretics                                         | 18         | 0      |
| Antiplatelet                                      | 16.9       | 0      |
| Supplements                                       | 13.9       | 0      |
| <i>Drug subgroups</i>                             |            |        |
| Adrenergics for systemic use                      | 113.5      | 0      |
| Antihypertensives                                 | 108        | 12.3   |
| Anti-parathyroid agents                           | 76.8       | 0      |
| Other analgesics and antipyretics                 | 79.2       | 22.8   |
| Immunosuppressants                                | 74.7       | 24.4   |
| Vitamin B                                         | 75.7       | 25.9   |
| Biguanides                                        | 14.3       | 62.7   |
| Glucagon like peptide 1 (GLP-1) analogues         | 53.2       | 6.4    |
| Calcium channel blockers                          | 2.7        | 44.7   |
| Other blood glucose lowering drugs, excl insulins | 42         | 0      |
| <i>Molecular targets</i>                          |            |        |
| Annexin A1                                        | 1687.4     | 235.9  |
| DNA                                               | 1043.8     | 0      |
| Glucagon-like peptide 1 receptor                  | 1110.8     | 113.3  |
| P-glycoprotein 1                                  | 1191.4     | 224.8  |
| Reverse transcriptase/RNaseH                      | 1145.9     | 195.5  |
| Solute carrier family 12 member 1                 | 1225.5     | 320    |
| Coagulation factor X                              | 1701.3     | 848.2  |
| Transcription factor AP-1                         | 853.3      | 2.9    |

|                       | Non-severe | Severe |
|-----------------------|------------|--------|
| Dipeptidylpeptidase 4 | 958        | 128.4  |
| Antithrombin-III      | 1405.8     | 638.2  |

**Table S3: Disease specific differences in the nodes of the DDSI network**

Only nodes with significant differences are shown, as confirmed by Chi square test.

*Heart*: patients suffering from cardiac conditions (chronic heart failure, atrial fibrillation, coronary heart disease and/or coronary sclerosis)

*Diabetes*: patients suffering from pre-diabetes, diabetes type 1 or diabetes type 2

| Drug groups                      | Non-severe COVID-19 [%] | Severe COVID-19 [%] | p value |
|----------------------------------|-------------------------|---------------------|---------|
| <i>Heart</i>                     |                         |                     |         |
| Anti-hyperglycemics              | 27.78                   | 12.07               | 0.03    |
| <i>Diabetes and heart</i>        |                         |                     |         |
| Anti-hyperglycemics              | 71.43                   | 33.33               | 0.007   |
| <b>Drug subgroups</b>            |                         |                     |         |
| <i>Heart</i>                     |                         |                     |         |
| Dipeptidylpeptidase 4 inhibitors | 12.7                    | 1.72                | 0.034   |
| <i>Diabetes and heart</i>        |                         |                     |         |
| Dipeptidylpeptidase 4 inhibitors | 32.65                   | 4.76                | 0.029   |

**Table S4: Disease specific differences in the edges of the DDSI network**

Only edges with significant differences are shown, as confirmed by Chi square test.

*Heart*: patients suffering from cardiac conditions (chronic heart failure, atrial fibrillation, coronary heart disease and/or coronary sclerosis)

*Diabetes*: patients suffering from pre-diabetes, diabetes type 1 or diabetes type 2

*Arterial hypertension*: patients with arterial hypertension

| Drug group combinations      |                      | Non-severe COVID-19 [%] | Severe COVID-19 [%] | p value      |
|------------------------------|----------------------|-------------------------|---------------------|--------------|
| <i>Diabetes</i>              |                      |                         |                     |              |
| Anti-hyperglycemics          | Anticoagulants       | 46.67                   | 23.53               | <b>0.029</b> |
| <i>Heart</i>                 |                      |                         |                     |              |
| Anti-hyperglycemics          | Anticoagulants       | 23.81                   | 6.9                 | <b>0.011</b> |
| <i>Diabetes and heart</i>    |                      |                         |                     |              |
| Anti-hyperglycemics          | Anticoagulants       | 61.22                   | 19.05               | <b>0.003</b> |
|                              | Statins              | 53.06                   | 23.81               | <b>0.046</b> |
| <i>Arterial hypertension</i> |                      |                         |                     |              |
| Antiplatelet agents          | Cardiovascular drugs | 22.53                   | 37.5                | <b>0.030</b> |

| Drug group combinations             |                            | Non-severe COVID-19 [% ] | Severe COVID-19 [% ] | p value      |
|-------------------------------------|----------------------------|--------------------------|----------------------|--------------|
|                                     | GORD all                   | 12.64                    | 25                   | <b>0.033</b> |
|                                     | Anti-infectives            | 11.54                    | 23.44                | <b>0.035</b> |
| Insulins                            | Psychoanaleptics           | 1.65                     | 7.81                 | <b>0.048</b> |
| <b>Drug subgroup combinations</b>   |                            |                          |                      |              |
| <b><i>Diabetes</i></b>              |                            |                          |                      |              |
| Antipsychotics                      | Sartans                    | 1.9                      | 11.76                | <b>0.048</b> |
| <b><i>Heart</i></b>                 |                            |                          |                      |              |
| Antipsychotics                      | Antiepileptics             | 0.79                     | 10.34                | <b>0.006</b> |
|                                     | Proton pump inhibitors     | 3.97                     | 15.52                | <b>0.014</b> |
|                                     | Other analgesics           | 7.94                     | 20.69                | <b>0.026</b> |
|                                     | Loop diuretics             | 3.17                     | 12.07                | <b>0.042</b> |
| <b><i>Arterial hypertension</i></b> |                            |                          |                      |              |
| Antipsychotics                      | Opioids                    | 1.65                     | 10.94                | <b>0.004</b> |
|                                     | Adrenergic inhalatives     | 0.55                     | 7.81                 | <b>0.006</b> |
|                                     | Loop diuretics             | 2.75                     | 12.5                 | <b>0.007</b> |
|                                     | Proton pump inhibitors     | 2.75                     | 12.5                 | <b>0.007</b> |
|                                     | Antiepileptics             | 1.1                      | 7.81                 | <b>0.019</b> |
|                                     | ACE inhibitors             | 1.65                     | 7.81                 | <b>0.048</b> |
|                                     | Beta blockers              | 4.4                      | 12.5                 | <b>0.049</b> |
| Acetylsalicylic acid                | Proton pump inhibitors     | 10.44                    | 23.44                | <b>0.017</b> |
|                                     | Beta blockers              | 14.84                    | 28.12                | <b>0.029</b> |
|                                     | Potassiumsparing diuretics | 1.65                     | 7.81                 | <b>0.048</b> |
| Loop diuretics                      | Heparin                    | 7.14                     | 18.75                | <b>0.016</b> |
|                                     | Opioids                    | 4.4                      | 14.06                | <b>0.019</b> |
| Platelet inhibitors                 | Proton pump inhibitors     | 12.09                    | 25                   | <b>0.024</b> |
|                                     | Beta blockers              | 15.93                    | 29.69                | <b>0.027</b> |
| Insulins                            | Antidepressants            | 1.65                     | 7.81                 | <b>0.048</b> |



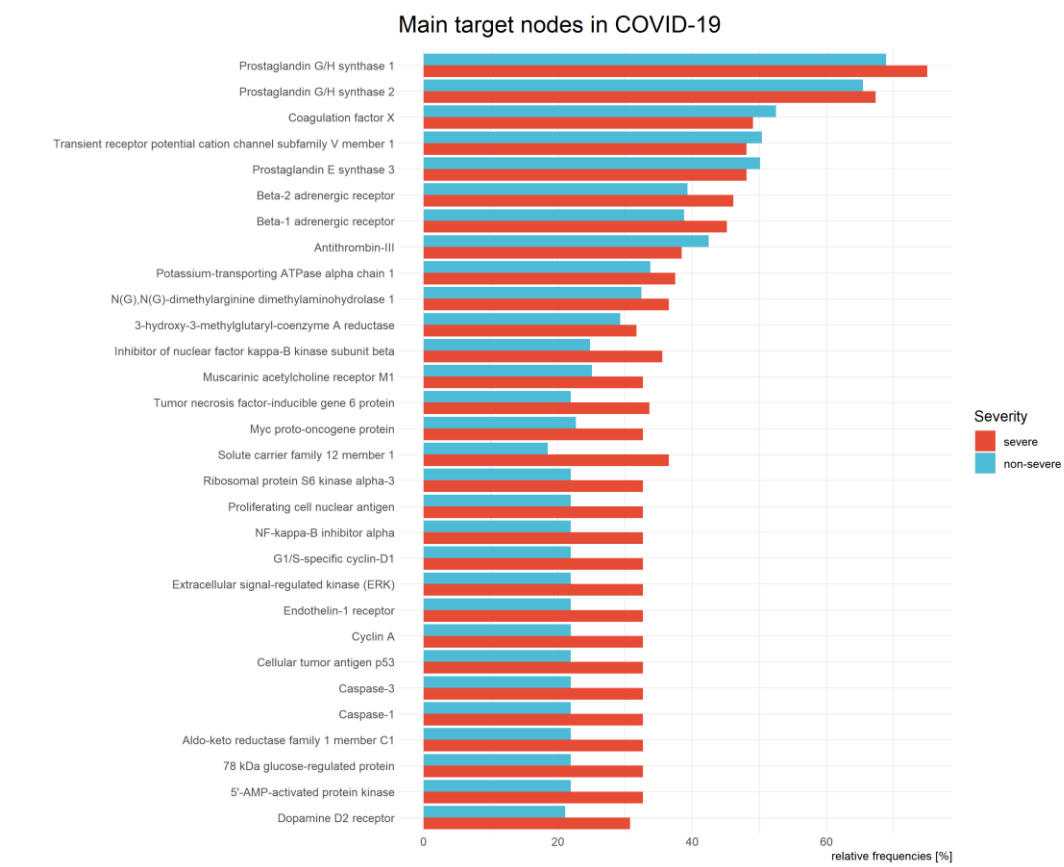

**Figure S1: Main target nodes**

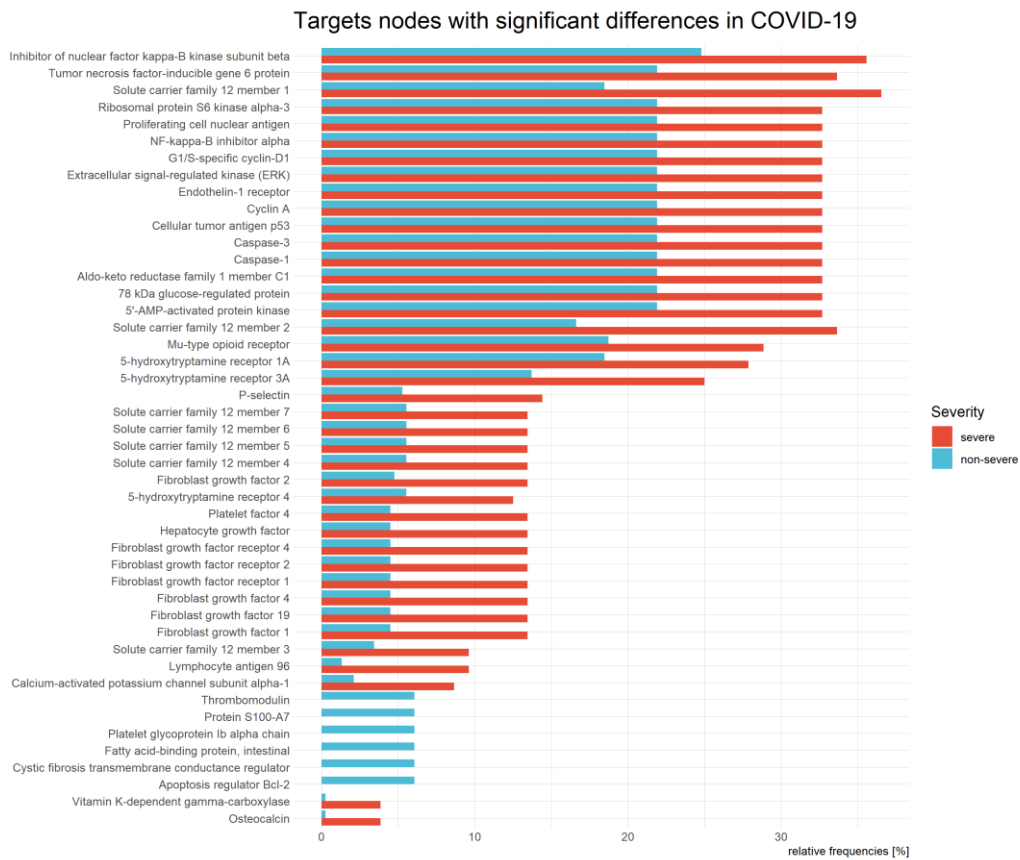

Figure S2: Target nodes with significant differences ( $p < 0.001$ )

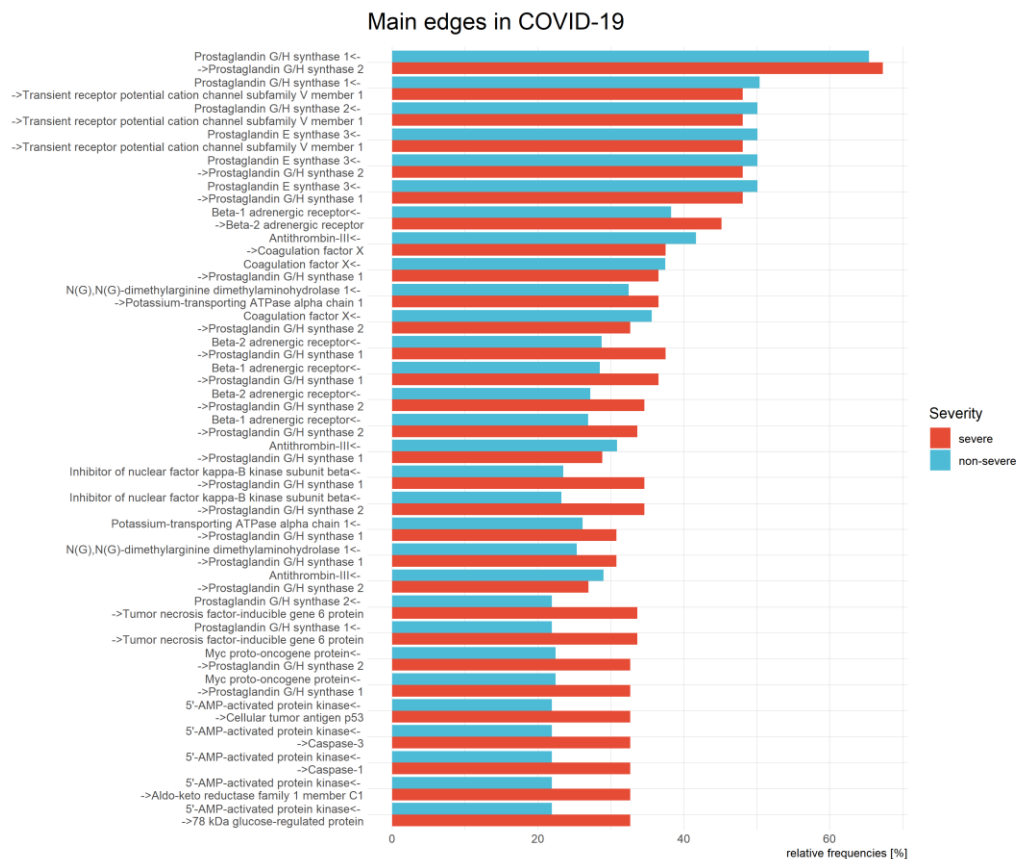

**Figure S3: Main target edges**

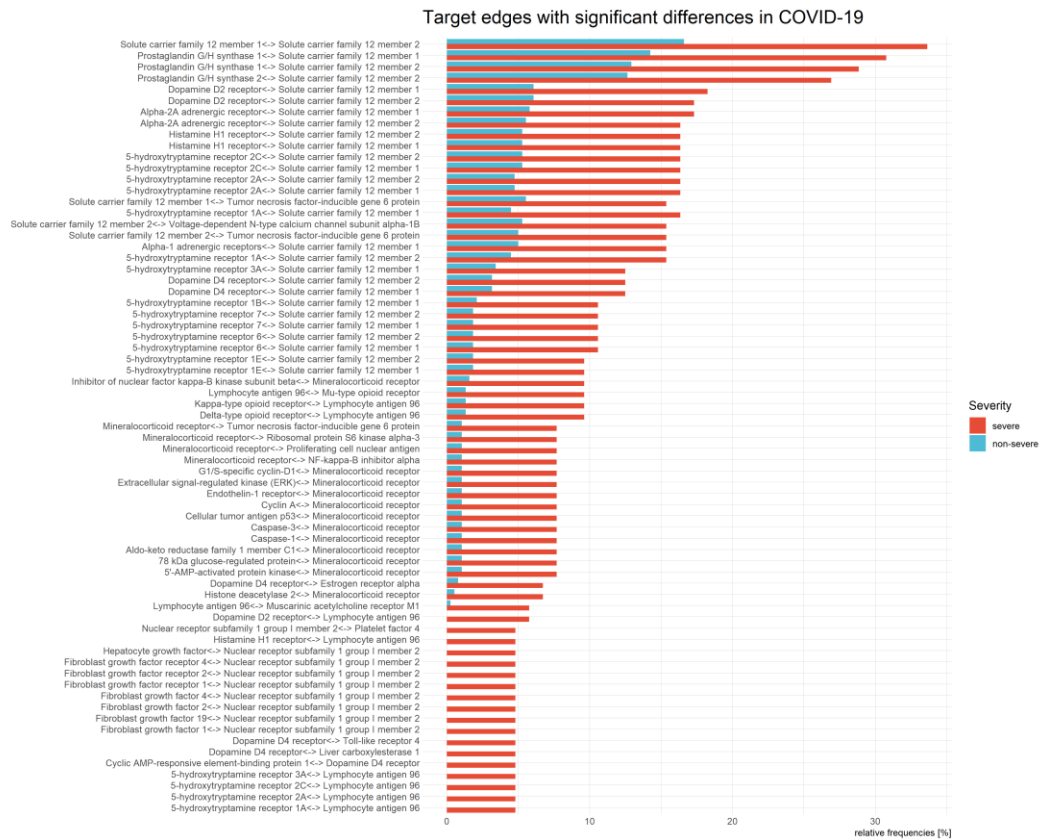**Figure S4: Target edges with highly significant differences (p<0.001)**
